# Supplementary material
Source: Royal Society of Chemistry journal article supplement (doi:10.1039/d6se00207b)
Supplement: d6se00207b1.pdf [file d6se00207b1.pdf]

## Supporting information

### **Cobalt Phthalocyanine-Ketjen Black Hybrid Electrocatalyst for Efficient and Stable Alkaline Water Splitting**

Shantharaja Daniel, Hyun Chul Kim,<sup>††</sup>

*<sup>1</sup> Department of Future Automotive Engineering, Green Car Technology Research Center, Hydrogen Energy Human Resources Development Group, Kongju National University, 1223-24(#7-211), Cheonandaero, Seobuk-Gu, Cheonan-Si, Chungnam, 31080, Republic of Korea.*

**Corresponding authors:** \*Prof. Hyun Chul Kim. E-mail: [khc@kongju.ac.kr](mailto:khc@kongju.ac.kr)

| <b>Content</b>        | <b>Descriptions</b>                                                                                                                                                                                                                                                                                                                  | <b>Page</b> |
|-----------------------|--------------------------------------------------------------------------------------------------------------------------------------------------------------------------------------------------------------------------------------------------------------------------------------------------------------------------------------|-------------|
| Materials and methods | Various chemical and reagents used for the synthesis and experimental measurements. Different spectro-analytical instruments and their specification utilized to study the properties of present electrocatalyst.                                                                                                                    | S3-S4       |
| Synthesis Producer    | Synthesis of Cobalt (II) tetra nitro phthalocyanine (Co (II)NPc) and Synthesis of 2,2-diphenylacetic acid.                                                                                                                                                                                                                           | S4-S6       |
| Figure SI1(a)         | $^1\text{H}$ NMR analysis Compound 3.                                                                                                                                                                                                                                                                                                | S7          |
| Figure SI1(b)         | $^1\text{H}$ NMR analysis Compound 3.                                                                                                                                                                                                                                                                                                | S8          |
| Figure SI1(c)         | Mass analysis Compound 3.                                                                                                                                                                                                                                                                                                            | S8          |
| Figure SI2            | $^1\text{H}$ NMR analysis Compound 5.                                                                                                                                                                                                                                                                                                | S9          |
| Figure SI3.           | Mass analysis Compound 6.                                                                                                                                                                                                                                                                                                            | S10         |
| Figure SI4            | XPS profiles Before stability of CoAPc+KB nanocomposite on glass substrate: <b>f)</b> survey scan, <b>a)</b> Co2p, <b>b)</b> C1s, <b>c)</b> N1s, <b>d)</b> O1s and <b>e)</b> Cl1s profiles and f) Survey scan of CoTBPC+KB.                                                                                                          | S11         |
| Figure SI5            | a) LSV iR corrected polarization curves for a) HER for CoNPc, FeNPc, NiNPc, KB, CoTBPC, Pt/C and hybrid composite of CoTBPC+KB b) OER CoNPc, FeNPc, NiNPc, KB, CoTBPC and hybrid composite of CoTBPC+KB in a 1.0 M KOH electrolyte at scan rate of $5 \text{ mV s}^{-2}$ . SEM Images of c) Before Stability and d) After Stability. | S12         |
| Figure SI6            | Double layer capacitance of a) CoTBPC+KB/GCE, b) CoTBPC/GCE, c) Bare GCE and d) Corresponding linear plots of current density versus scan rate for the calculation of $C_{dl}$ values.                                                                                                                                               | S13         |
| Table S1              | Comparison of HER and OER activities of CoTBPC+KB/GC (4mg:1mg) catalyst in basic media with catalysts reported in the literature.                                                                                                                                                                                                    | S14         |

## **Materials**

Benzylideneacetophenone, benzaldehyde, Benzene-1,2-diamine ( $C_6H_8N_2$ ), 2,2-diphenylacetic acid ( $C_{14}H_{12}O_2$ ), ammonium chloride, ammonium molybdate, anhydrous potassium carbonate, and HCl were purchased from Sigma Aldrich south korea. 5% Nafion solution, N, N'-dicyclohexylcarbodiimide, 2,3,4,6,7,8,9,10-Octahydropyrimido[1,2-a] azepine (DBU), 2-pentanol, 8-hydroxyquinoline, Oxolane, sodium sulfide, N, N'-dimethylformamide, methanol, ethanol was purchased from Merck, South korea. Electrodes were obtained from fuel cell store, south korea. 2, 10, 16, 24-tetrakis {4-((2-benzhydrylamino) phenyl) amino)-2-isocyanobenzonitrile} cobalt phthalocyanine (CoTBPC) were synthesized according to the literature [JEAC-hydrazine]. Methanol ( $CH_3OH$ ), ethanol ( $C_2H_5OH$ ), acetone ( $CH_3COCH_3$ ), n-hexane ( $C_6H_{14}$ ), tetrabutyl ammonium perchlorate (TBAP:  $C_{16}H_{36}ClNO_4$ ) were purchased from Sigma-Aldrich and used as received.

### ***Methods***

The melting point of the sample was ascertained using a Sisco instrument (model no. 70818209). Elemental composition analysis of the synthesized materials was conducted with a Vario ELIII CHNS elemental analyzer. The electronic absorption spectrum of the sample was recorded using an Ocean Optics spectrometer equipped with a flame (FLAME-S-UV-VIS-ES, serial no. FLS04808) over the wavelength range of 300–800 nm. Fourier-transform infrared (FT-IR) spectroscopy was carried out on a Spectrum Two FT-IR spectrometer (PerkinElmer) with a resolution of  $1\text{ cm}^{-1}$ , employing the KBr pellet method. The thermal stability of the phthalocyanine was evaluated using a STA 6000 Simultaneous Thermal Analyzer (PerkinElmer) within the temperature range of 20–1000 °C at a heating rate of 10 °C/min under an air flow of 30 mL/min. X-ray diffraction (XRD) analysis was carried out using a Bruker D8 Advance diffractometer. Scanning Electron Microscopy (SEM) images and Energy Dispersive X-ray Spectroscopy (EDX) data were acquired from a JSM-IT500LA (JEOL), X-ray Photoelectron Spectroscopy (XPS) analysis was performed on a SPECS MXPS system.

All electrochemical measurements were conducted using a Corrtest potentiostat electrochemical workstation CS350M with a conventional three-electrode setup. The Glassy carbon electrode (GCE) served as the working substrate, with Hg/HgO (3M KCl) as the reference electrode and a

platinum wire as the counter electrode. The Nernst equation was employed to convert all measured potential values from the Hg/HgO electrode to RHE values, using equation 1S.

### ***Modification of the electrode***

The electrochemical measurements of modified electrodes were performed using Corrtest potentiostat electrochemical workstation CS350M. Electrochemical performance of CoTBPC, NiNPc, FeNPc and CoTBPC+KB was studied employing cyclic voltammetry (CV), linear sweep voltammetry (LSV), chronopotentiometry, and electrochemical impedance in an electrochemical workstation with a typical two-electrode configuration.<sup>1</sup> A standard two-electrode configuration was set up to carry out all the electrochemical experiments using Corrtest potentiostat electrochemical workstation CS350M. A glassy carbon electrode (GCE) was utilized as the working electrode, while a mercury/mercury oxide (Hg/HgO, 3M KCl) electrode served as the reference electrode, and a platinum wire functioned as the counter electrode. The Nernst equation was used to convert all recorded potential values from the Hg/HgO electrode to RHE values, as described by equation 1S.<sup>2</sup>

$$E_{\text{RHE}} = E_{\text{Hg/HgO}} + 0.098 + 0.059\text{pH} \text{ ----- Eqn..... 1}$$

### ***Synthesis of Cobalt (II) tetra nitro phthalocyanine (Co (II)NPc).***<sup>3,4</sup>

Cobalt (II) tetra nitro phthalocyanine (Co (II)NPc) was prepared by making slight modifications to the procedure outlined for synthesizing metal phthalocyanines. A mixture of 0.5 g (0.0038508 mol) of Co (II)Cl<sub>2</sub>, 2.66 g (0.0153641 mol) 1,2-benzenedicarbonitrile, and 2-pentanol solvent (20 mL) with 4 drops of 2,3,4,6,7,8,9,10-Octahydropyrimido[1,2-a] azepine (DBU) was reflux for 28 hours by continuous stirring, maintaining a constant temperature of 135–138 °C.<sup>5</sup> The greenish-blue product was cooled and filtered off and was washed thoroughly with methanol, acetone and hexane. A yield of 96% Co (II)NPc was achieved and its theoretical molecular weight is 751.46 g mol<sup>-1</sup>. The theoretical chemical composition (C<sub>32</sub>H<sub>12</sub>N<sub>12</sub>O<sub>8</sub>Co) is 51.78% C, 1.99% H, 23.03% N, 16.24% O, 6.96% Co.

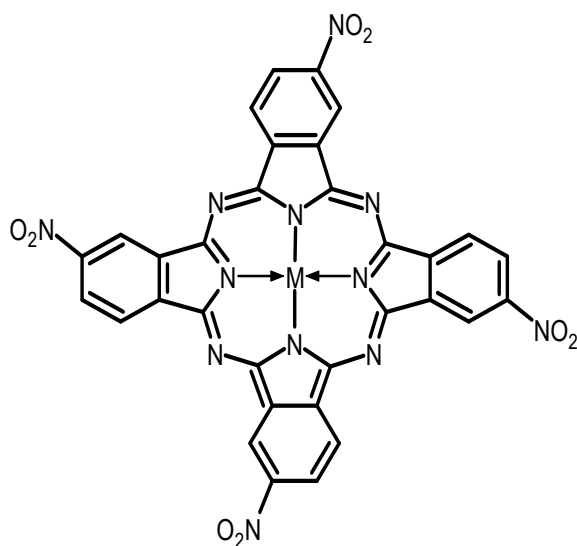

M=Co, Ni, Fe.....etc.,

**Scheme. S11. General synthetic route for CoNPc.**

***Synthesis of 2,2-diphenylacetic acid<sup>6</sup>***

Begin with 1 g (0.009423 mole) of benzylideneacetophenone (chalcone) and mix it with 1.96 g (0.0094 mol) of benzaldehyde in ethanol as the solvent. Add a catalytic amount of NaOH (0.1 mol, 4.0 g) and stir the reaction mixture at room temperature for 12–24 hours to allow aldol condensation to occur, forming the  $\beta$ -hydroxy ketone intermediate. Upon completion, acidify the reaction mixture to neutralize the base and isolate the crude product by filtration. Dry and purify the chalcone by recrystallization. Next, subject the chalcone to oxidative cleavage using 1.48 g (0.009365 mol) of potassium permanganate in aqueous acidic medium (e.g., H<sub>2</sub>SO<sub>4</sub>) under cooling. After reaction completion, filter off the manganese dioxide and extract the diketone product using dichloromethane. Dry and concentrate the organic layer. Finally, heat the diketone under reflux with a catalytic amount of acid (e.g., HCl) to induce intramolecular cyclization, forming the hydroxy-substituted dihydroisobenzofuran. Recrystallize the final product from ethanol.<sup>7</sup> The overall mole ratio is 1:1:1 (benzylideneacetophenone: benzaldehyde: oxidant), with catalytic amounts of base and acid.

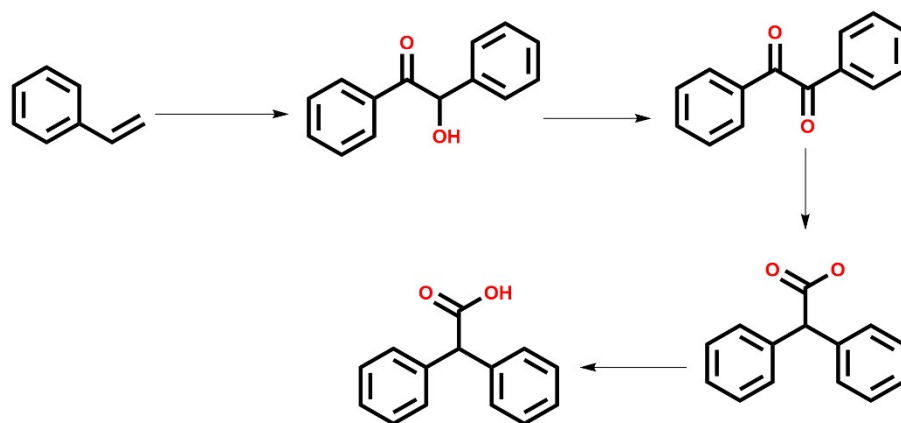

**Scheme. S12. General synthetic route for 2,2-diphenylacetic acid.**

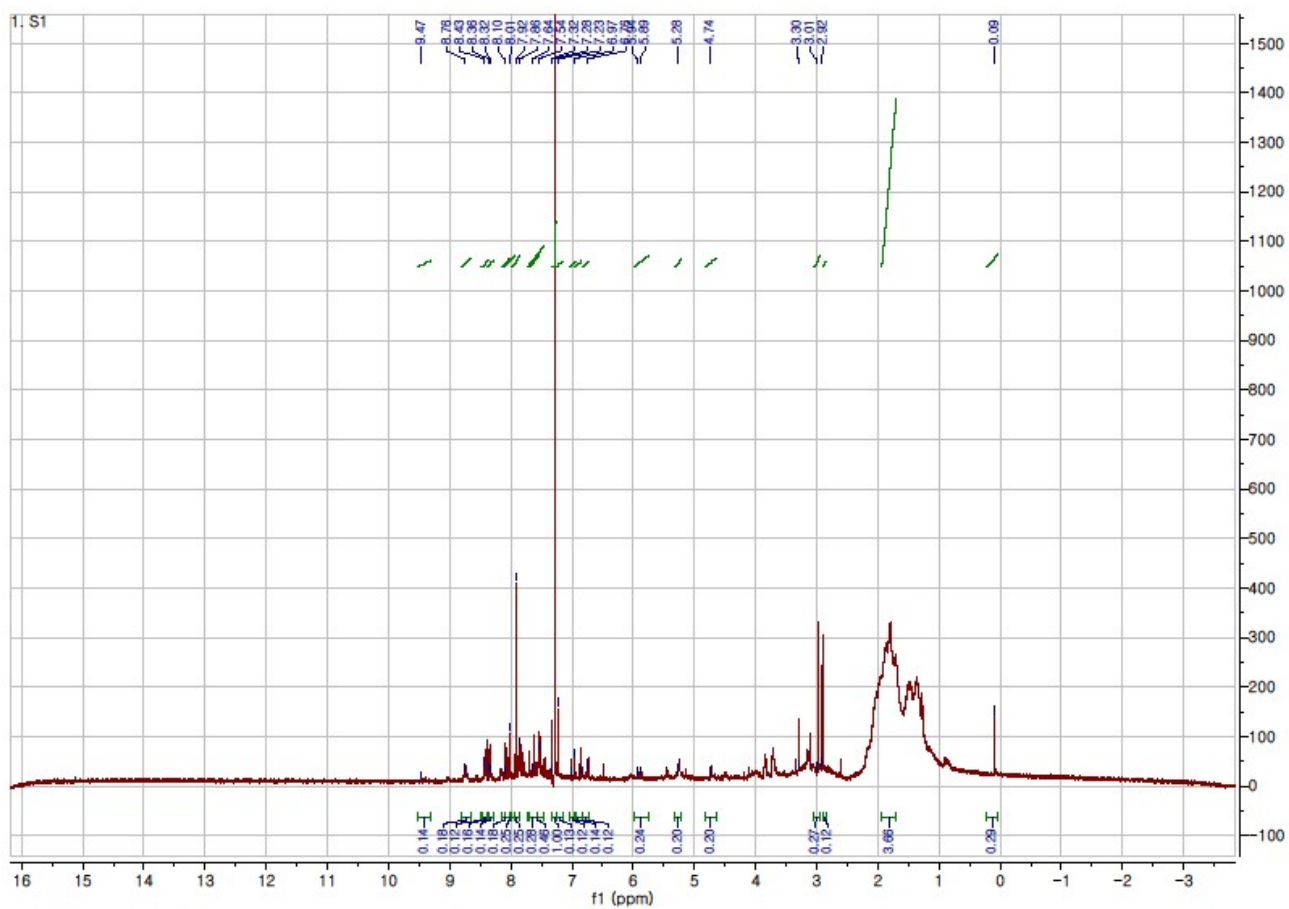

Figure S11(a).  $^1\text{H}$  NMR analysis Compound 3.

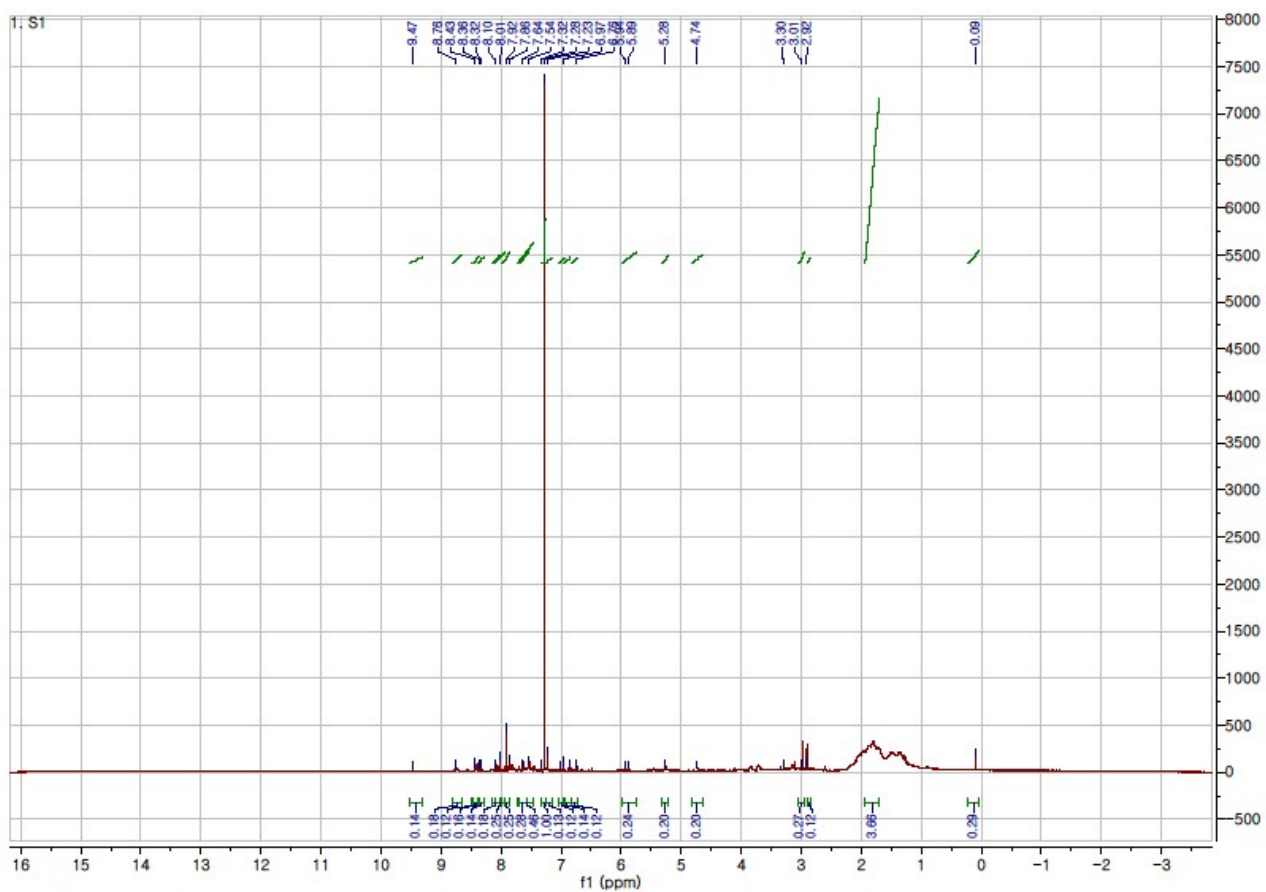

Figure SI1(b).  $^1\text{H}$  NMR analysis Compound 3.

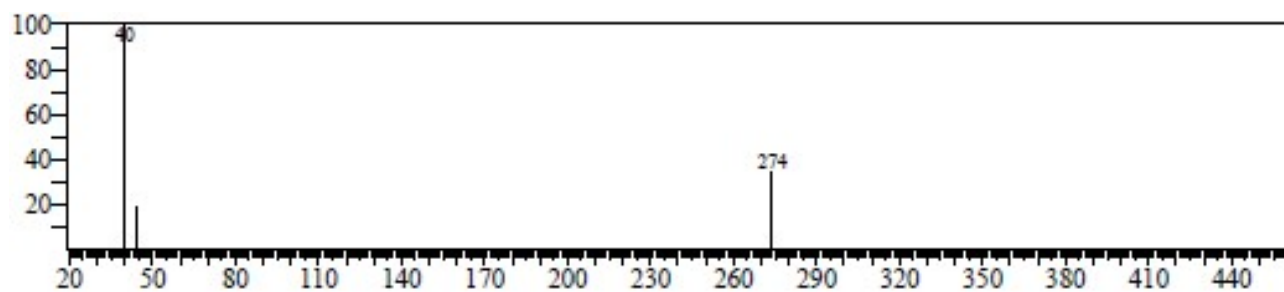

Figure SI1(c). Mass analysis Compound 3.



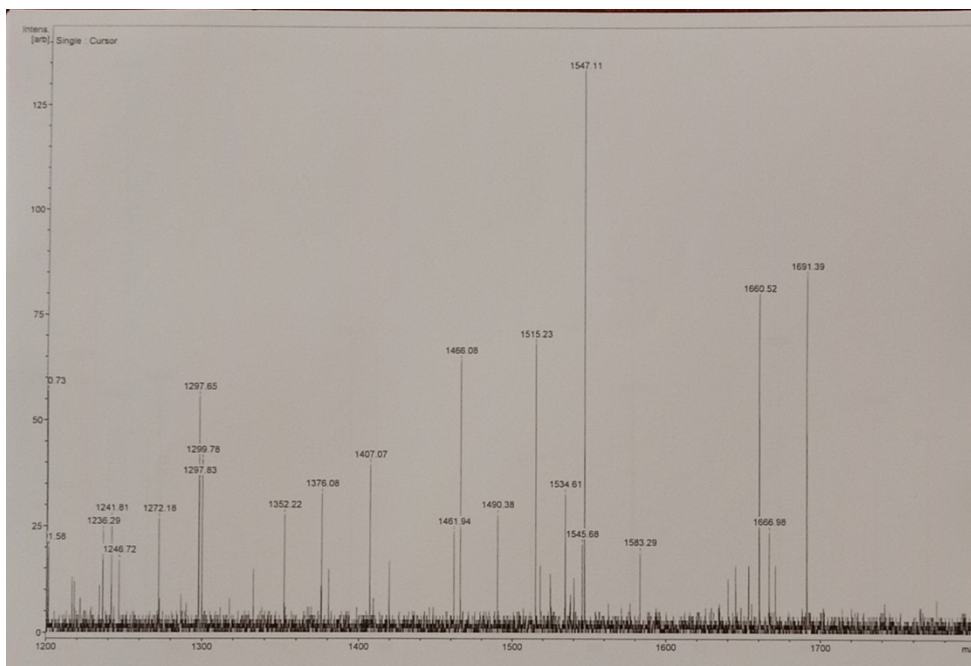

Figure S13. Mass analysis Compound 6.

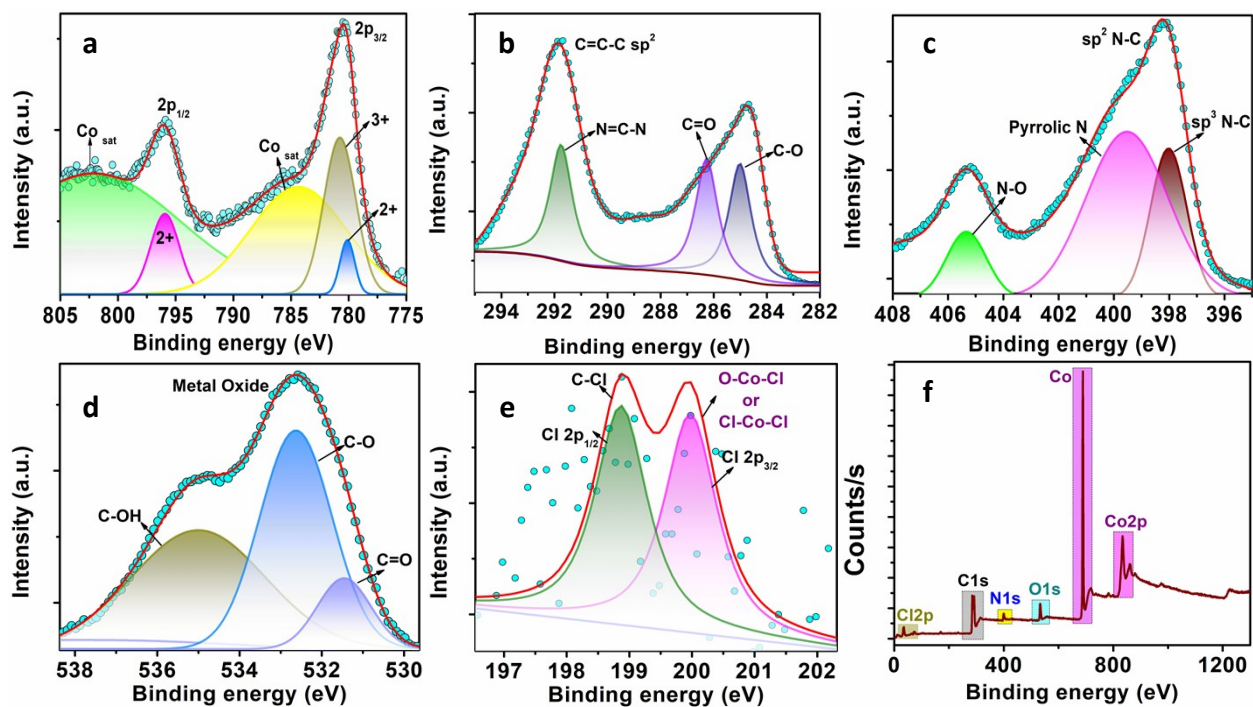

**Figure S14.** XPS profiles Before stability of CoAPc+KB nanocomposite on glass substrate: **f)** survey scan, **a)** Co2p, **b)** C1s, **c)** N1s, **d)** O1s and **e)** Cl1s profiles and **f)** Survey scan of CoTBPC+KB.

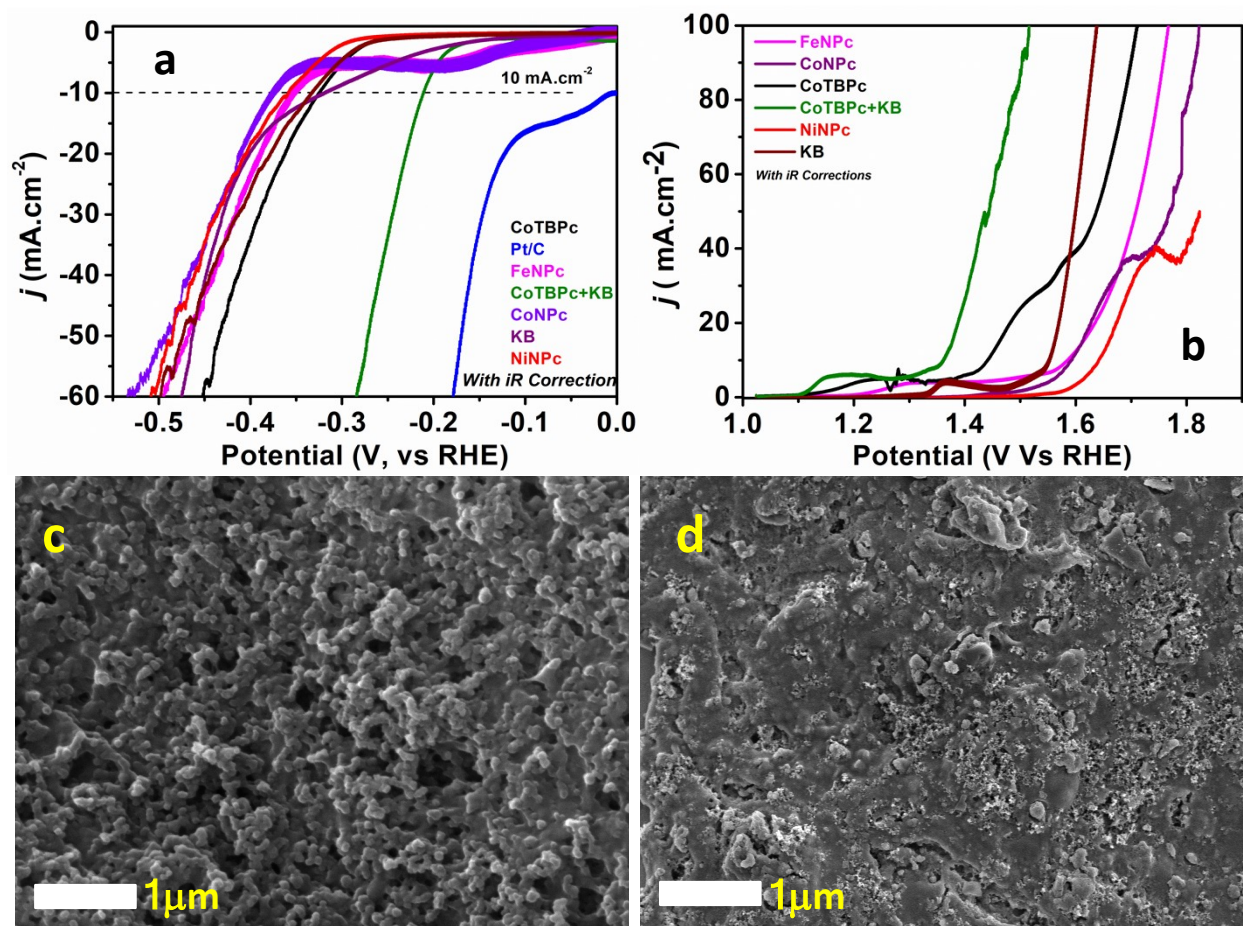

**Figure SI5.** a) LSV iR corrected polarization curves for a) HER for CoNPc, FeNPc, NiNPc, KB, CoTBPc, Pt/C and hybrid composite of CoTBPc+KB b) OER CoNPc, FeNPc, NiNPc, KB, CoTBPc and hybrid composite of CoTBPc+KB in a 1.0 M KOH electrolyte at scan rate of 5 mV s<sup>-2</sup>. SEM Images of c) Before Stability and d) After Stability.

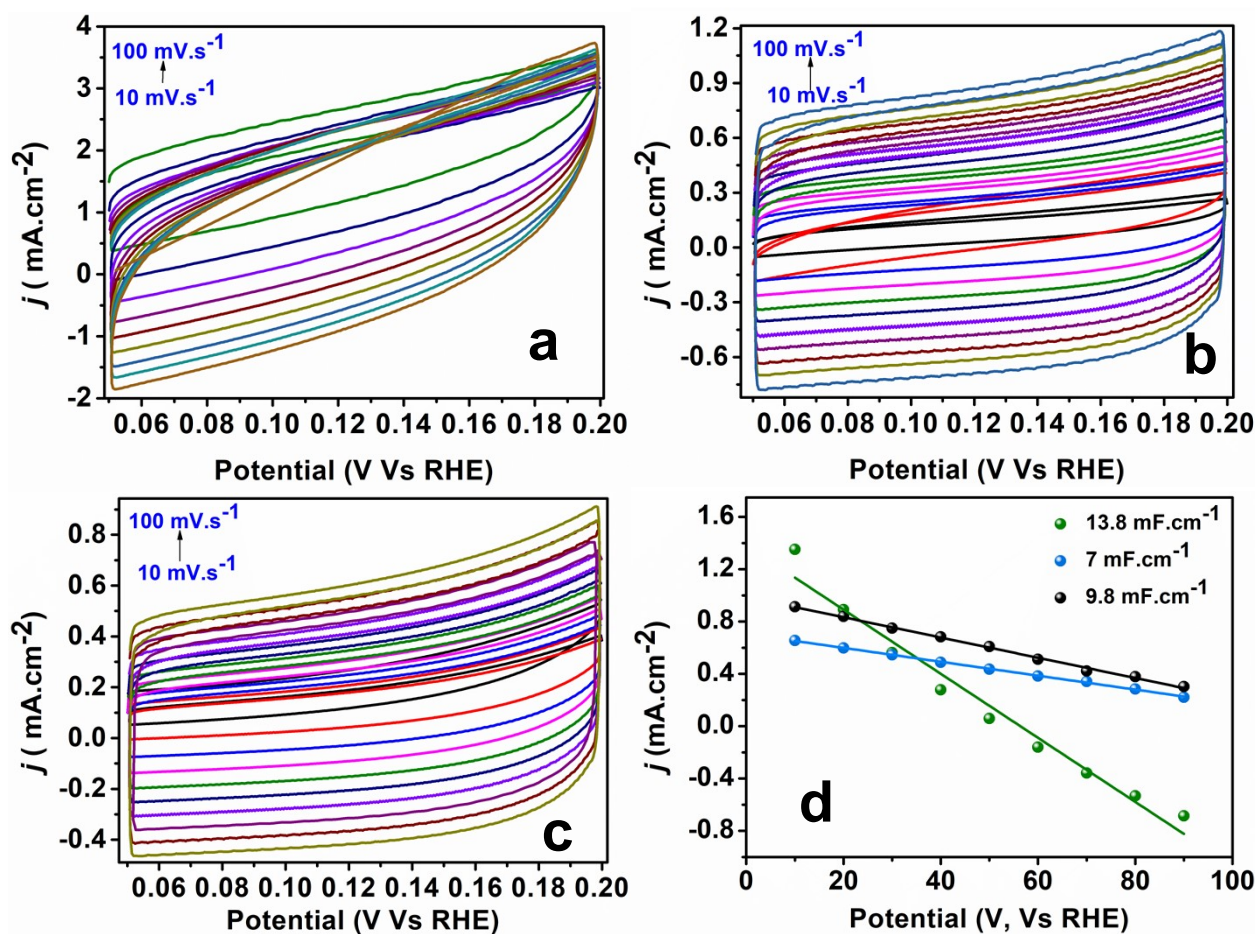

**Figure SI6.** Double layer capacitance of a) CoTBPC+KB/GCE, b) CoTBPC/GCE, c) Bare GCE and d) Corresponding linear plots of current density versus scan rate for the calculation of  $C_{dl}$  values.

| Table S1: Comparison of HER and OER activities of CoTBPC+KB/GC (4mg:1mg) catalyst in basic media with catalysts reported in the literature. |                                                                                     |                               |                                                  |                  |
|---------------------------------------------------------------------------------------------------------------------------------------------|-------------------------------------------------------------------------------------|-------------------------------|--------------------------------------------------|------------------|
| Material                                                                                                                                    | Overpotential ( $\eta$ ) [mV]                                                       | Tafel (mV dec <sup>-1</sup> ) | Electrolyte                                      | Ref              |
| CoLBr <sub>2</sub> (HER)/CC<br>NiLBr <sub>2</sub> (OER)/CC                                                                                  | $\eta_{10}=-256$<br>$\eta_{10}=376$                                                 | 155<br>86                     | 1M KOH                                           | 8                |
| Complexes 10/CC<br>Complexes 10/RRDE                                                                                                        | $\eta_{10}=-375$<br>$\eta_{10}=-336$                                                | 144<br>112                    | 1M KOH<br>0.5 M H <sub>2</sub> SO <sub>4</sub>   | 9                |
| ZIF-9-Fe <sub>3</sub> -Pyrol (OER)                                                                                                          | $\eta_{10}=320$                                                                     | 99                            | 0.1M KOH                                         | 10               |
| ZIF-9(III)/Co LDH-15                                                                                                                        | $\eta_{10}=297$                                                                     | 81                            | 1M KOH                                           | 11               |
| Co-P/NC/CC (carbon cloth, ZIF-67/CC, and Co/NC/CC)                                                                                          | $\eta_{10}=-171$<br>$\eta_{10}=360$                                                 | 52(HER)<br>62(OER)            | 1M KOH                                           | 12               |
| MoS <sub>2</sub> /CoB-Se/CC                                                                                                                 | $\eta_{10}=272$<br>$\eta_{10}=270$                                                  | 119<br>(HER)<br>86 (OER)      | 1M KOH                                           | 13               |
| CoP@ZIF-8/pNF                                                                                                                               | $\eta_{10}=77$ (HER)<br>$\eta_{10}=226$ (OER)                                       | 55.3<br>77.7                  | 1MKOH                                            | 14               |
| ZIF-67                                                                                                                                      | $\eta_{10}=72$ (HER)<br>329(OER)                                                    | 65<br>107                     | 1M KOH                                           | 15               |
| b-ZIF-67/Mxene                                                                                                                              | $\eta_{10}=0.170$<br>(HER)<br>1.47 (OER)                                            | 69<br>74                      | 0.5 M H <sub>2</sub> SO <sub>4</sub><br>0.1M KOH | 16               |
| ZIF-67                                                                                                                                      | $\eta_{10}=1.49$ (OER)                                                              | 62.1                          | 1M KOH                                           | 17               |
| Co-Fe-MOF                                                                                                                                   | $\eta_{10}=310$ (OER)                                                               | 53                            | 1M KOH                                           | 18               |
| ZIF-9+BCN+rGO/CC                                                                                                                            | $\eta_{10}=-222$<br>$\eta_{10}=374$                                                 | 39<br>73                      | 1M KOH                                           | 19               |
| CoPc@rGO-MOF                                                                                                                                | $\eta_{10}=98$                                                                      | 56                            | 1M KOH                                           | 20               |
| 1-Fe@CNT(HER)<br>1-Co@CNT(OER)                                                                                                              | $\eta_{10}=445$ (HER)                                                               | -                             | 1M KOH                                           | 21               |
| FCG-6/Ni-foam hybrid                                                                                                                        | $\eta_{100}=313$ (OER)<br>$\eta_{100}=263$ (HER)                                    | 51.1<br>111.5                 | 1M KOH                                           | 22               |
| <b>CoTBPC-KB</b>                                                                                                                            | <b><math>\eta_{100}=313</math> (OER)</b><br><b><math>\eta_{10}=229</math> (HER)</b> | <b>289</b><br><b>42</b>       | <b>1M KOH</b>                                    | <b>This work</b> |

## References

- 1 Z. Yhobu, G. B. Markandeya, J. G. Małeckı, D. H. Nagaraju, V. S. Betagerı and S. Budagumpı, *ACS Appl. Energy Mater.*, 2024, **7**, 1202–1211.
- 2 S. Daniel, M. Vijayakumar, A. Gandıgawad, R. B. Dateer and S. Budagumpı, *Energy and Fuels*, 2024, **38**, 14632–14644.
- 3 . S. and H. C. Kim, *Catal. Sci. Technol.*, DOI:10.1039/d5cy00682a.
- 4 G. Patıl, S. Daniel and K. S. Lokesh, *Int. J. Hydrogen Energy*, 2024, **86**, 104–113.
- 5 M. Nemakal, Shantharaja, Gıddaerappa, M. Palanna, L. Koodlur Sannegowda and P. Sharath Kumar, *Journal of Electroanalytical Chemistry*, DOI:10.1016/j.jelechem.2021.115385.
- 6 L. Sancıneto, C. Tidei, L. Bagnoli, F. Marını, E. J. Lenardão and C. Santi, *Molecules*, 2015, **20**, 10496–10510.
- 7 H. Senboku and M. Hayama, *Beilstein Journal of Organic Chemistry*, 2024, **20**, 2392–2400.
- 8 Z. Yhobu, M. J. Patel, J. G. Małeckı, D. H. Nagaraju and S. Budagumpı, *ACS Appl. Energy Mater.*, DOI:10.1021/acsaem.4c02127.
- 9 M. Vijayakumar, J. G. Małeckı, D. H. Nagaraju, R. S. Keri and S. Budagumpı, *Langmuir*, DOI:10.1021/acs.langmuir.4c03248.
- 10 A. Pendashteh, S. M. F. Vılela, I. Krıvtsov, D. Ávila-Brandı, J. Palma, P. Horcajada and R. Marcılla, *J. Power Sources*, 2019, **427**, 299–308.
- 11 W. Chen, C. Wang, S. Su, H. Wang and D. Cai, *Chemical Engineering Journal*, DOI:10.1016/j.cej.2021.128784.
- 12 X. Liu, J. Dong, B. You and Y. Sun, *RSC Adv.*, 2016, **6**, 73336–73342.
- 13 M. Song, Y. Zhao, Z. Wu and X. Liu, *Sustain. Energy Fuels*, 2020, **4**, 5036–5041.
- 14 H. Wang, L. Zhang, W. Zhang, S. Sun and S. Yao, *Nanomaterials*, 2023, **13**, 1386.
- 15 M. J. Liu, F. H. Yang, J. C. Mei, X. Guo, H. Y. Wang, M. Y. He, Y. A. Yao, H. F. Zhang and C. Bin Liu, *Nanomaterials*, DOI:10.3390/nano13172421.
- 16 R. S. Mane, S. Mane, V. Somkuwar, N. V. Thombre, A. V. Patwardhan and N. Jha, *Battery Energy*, DOI:10.1002/bte2.20230019.
- 17 M. A. Rahman, Z. Cai, Z. M. Moushumy, R. Tagawa, Y. Hidaka, C. Nakano, M. S. Islam, Y. Sekine, Y. Nishina, S. Ida and S. Hayami, *ACS Omega*, DOI:10.1021/acsomega.4c00403.

- 18 V. Singh, D. K. Singh, M. Yadav, S. Singh, V. Rathour, A. Tiwari and V. Ganesan, *Energy Advances*, 2024, **3**, 636–647.
- 19 S. Daniel, H. C. Kim and A. R. Podilapu, *Langmuir*, 2025, **41**, 20734–20745.
- 20 M. Shi, G. Tang, S. Hua and J. Hu, *International Journal of Electrochemical Science*, DOI:10.1016/j.ijoes.2026.101291.
- 21 X. Jin, X. Li, H. Lei, K. Guo, B. Lv, H. Guo, D. Chen, W. Zhang and R. Cao, *Journal of Energy Chemistry*, 2021, **63**, 659–666.
- 22 P. P. Mondal, S. Singha Roy, R. Chand, M. Singh, S. Kundu and S. Neogi, *ACS Appl. Mater. Interfaces*, DOI:10.1021/acsami.5c23129.
